# Supplementary material
Source: Springer Nature journal article supplement (https://www.springermedizin.de/resource/supplementary/12958_2012_1088_MOESM2_ESM.pdf/9566768)

**A**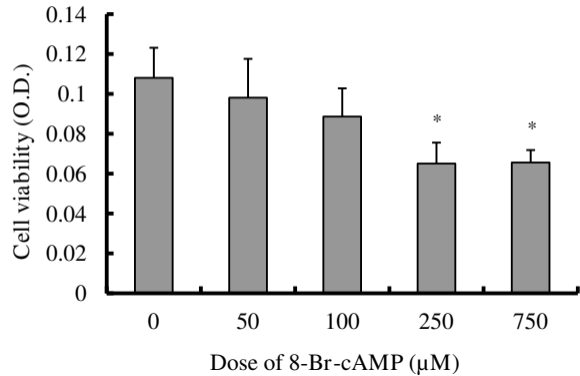**B**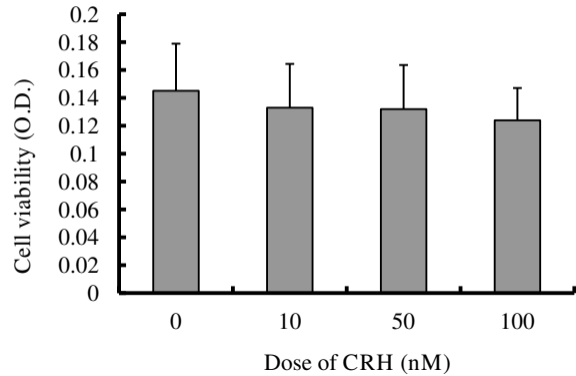

Supplement: MOESM2 [file 9566768]
